# Supplementary material for: Expression of a Chlorophyll b Reductase Gene from Zoysia japonica Causes Changes in Leaf Color and Chlorophyll Morphology in Agrostis stolonifera
Source: MDPI journal article supplement (doi:10.3390/ijms23116032), 2022-05-27
Supplement: s1 [file s1]

# Expression of a Chlorophyll *b* Reductase Gene from *Zoysia japonica* Causes Changes in Leaf Color and Chlorophyll Morphology in *Agrostis stolonifera*

Di Dong <sup>†</sup>, Zhuoxiong Yang <sup>†</sup>, Yuan Ma, Shuwen Li, Mengdi Wang, Yinruizhi Li, Zhuocheng Liu, Liebao Han <sup>\*</sup> and Yuehui Chao <sup>\*</sup>

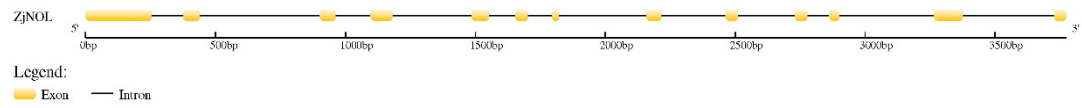

**Supplementary Figure S1.** Intron/exon arrangement of *ZjNOL*. Exons and introns are depicted as yellow boxes and black lines, respectively.

A

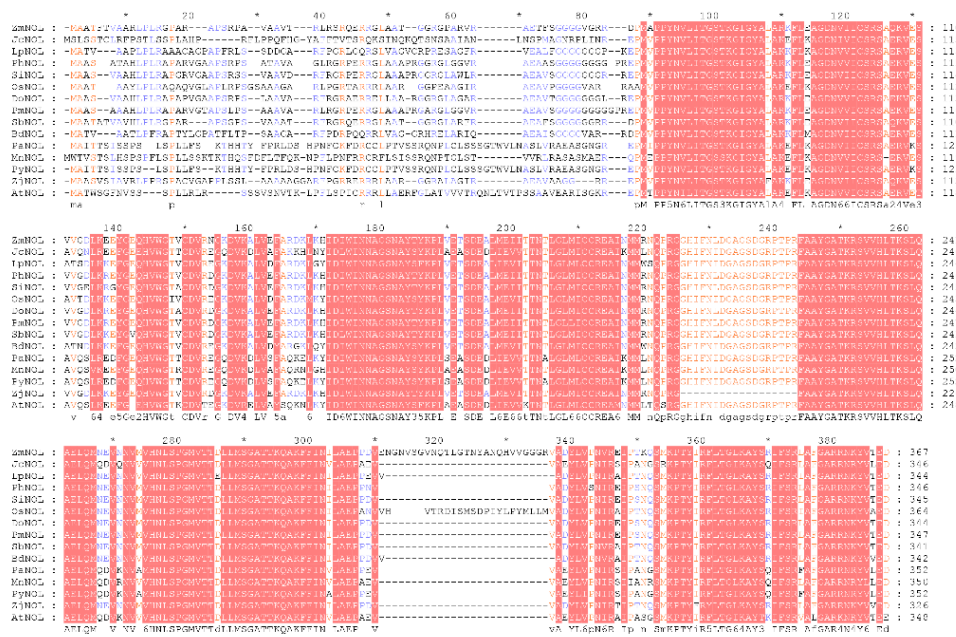

B

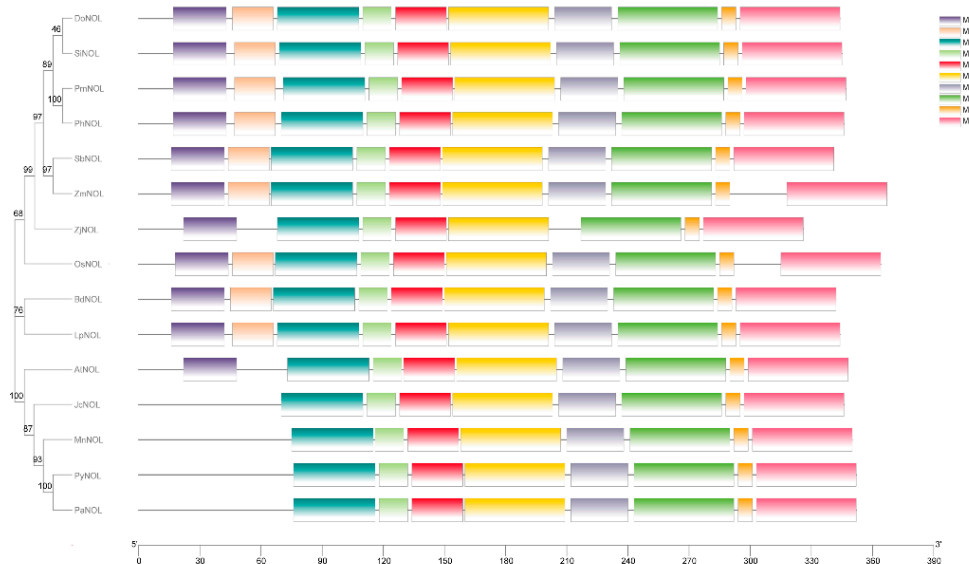

**Supplementary Figure S2.** Sequence alignment. (A) phylogenetic tree and conserved structure analysis (B) among 15 NOL proteins. Protein sequence accession numbers are as follows: OsNOL, XP\_015628273.1, *Oryza sativa*; DoNOL, OEL34851.1, *Dichanthelium oligosanthes*; SbNOL, XP\_021306305.1, *Sorghum bicolor*; PmNOL, RLN40231.1, *Panicum miliaceum*; SiNOL, XP\_012704137.1, *Setaria italica*; PhNOL, XP\_025797592.1, *Panicum hallii*; ZmNOL, PWZ24759.1, *Zea mays*; BdNOL, XP\_010231930.1, *Brachypodium distachyon*; JcNOL, XP\_012070563.1, *Jatropha curcas*; MnNOL, XP\_024026259.1, *Morus notabilis*; PyNOL, PQP93509.1, *Prunus yedoensis*; PaNOL, XP\_021829320.1, *Prunus avium*; LpNOL, AQM55941.1, *Lolium perenne*; AtNOL, AT5G04900.1, *Arabidopsis thaliana*.

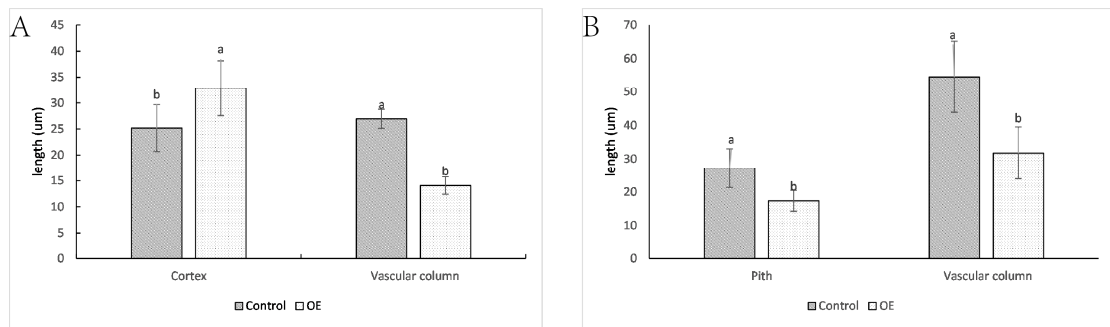

**Supplementary Figure S3.** Length of cells in leaves and stems of control and OE. A: The cell length of cortex and vascular column cells of leaves in control and OE. B: The cell length of pith and vascular column cells of leaves in control and OE. Different letters above the columns indicate significant differences ( $p < 0.05$ ,  $n = 20$ ).

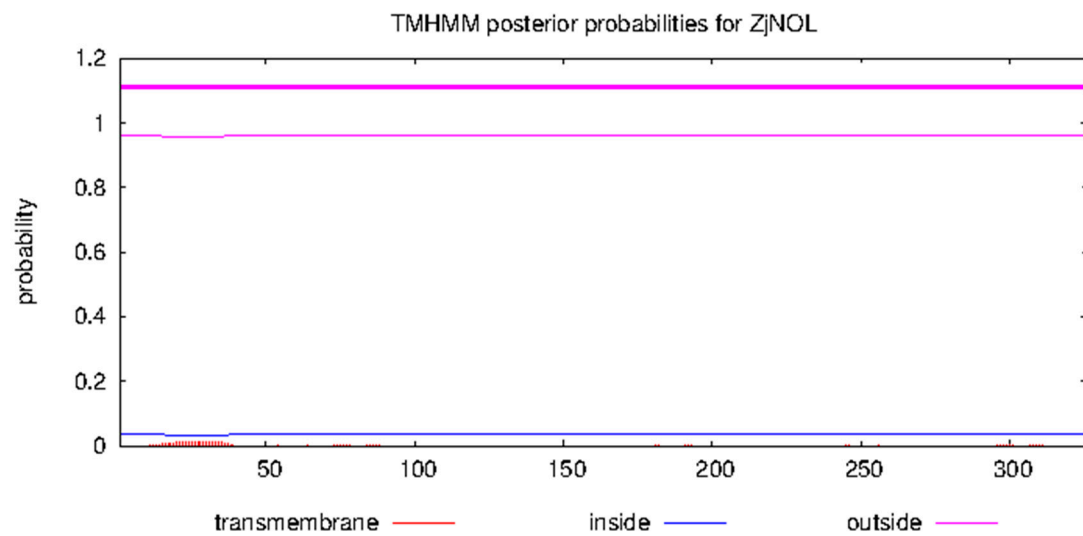

**Supplementary Figure S4.** Prediction of transmembrane helices in ZjNOL. The prediction results showed that ZjNOL protein contains no transmembrane domain.

Supplementary Table S1. Ten DEGs detected by RNA-Seq and qRT-PCR

| Gene ID          | Gene name                                  | Log <sub>2</sub> ratio |          |
|------------------|--------------------------------------------|------------------------|----------|
|                  |                                            | RNA-seq                | qRT-PCR  |
| c144913.graph_c0 | Fructan exohydrolase                       | 1.812982               | 3.372398 |
| c158384.graph_c1 | Trehalose-6-phosphate synthase             | 1.092785               | 1.855146 |
| c162235.graph_c0 | CK1                                        | 1.094827299            | 2.584788 |
| c130919.graph_c0 | YLS3                                       | 1.159874               | 1.551542 |
| c130658.graph_c0 | Jacalin-related lectin 9                   | 1.574661               | 0.855043 |
| c150749.graph_c0 | WRKY23                                     | -1.79098               | -0.56614 |
| c162887.graph_c0 | Lipoxygenase                               | -1.0241                | -0.52376 |
| c154787.graph_c0 | Ethylene-responsive transcription factor 9 | -1.28581               | -1.63941 |
| c162448.graph_c0 | Fatty acyl-CoA reductase 1                 | -1.31387               | -0.90685 |
| c143178.graph_c0 | Ethylene-responsive transcription factor 4 | -1.33728               | -0.73319 |

A total of ten genes including FEH, TPS, CK1, YLS3, JRL9, WRKY23, LOX, ERF9, FAR1, ERF4 were selected for quantitative RT-PCR assays.

Supplementary Table S2. Primers used in the study

| Primer name      | Primer sequence (5'–3')                      |
|------------------|----------------------------------------------|
| ZjNOL-qPCR-F2    | ACGAAGCGAAGTGTGTG                            |
| ZjNOL-qPCR-R2    | GGATTGATTAGTAGGGATTGT                        |
| ZjNOL-F          | CCACCTCGTTTCTTCCTTATTT                       |
| ZjNOL-R          | CGGTATCCCTTTGTTTGGTG                         |
| pGBKT7-ZjNOL-F   | AGGAGGACCTGCATATGGCCATGGCTGCCAGCGTCAGCATCGCC |
| pGBKT7-ZjNOL-R   | ATCCCCGGGAATTCGGCCTCATCTTCAACAACATACTTAT     |
| pGAKD7-ZjNYC-F   | AGGCCAGTGAATTCCACCCGATGGCCGCCGCCGCCGTCGC     |
| pGAKD7-ZjNYC-R   | ATCCCGTATCGATGCCCACCTGTGCCTGGAAGAGGACCAC     |
| 3302Y-ZjNOL-F    | CTAGTCCTAGGGACGTCAATGGCTGCCAGCGTCAGCATCGCC   |
| 3302Y-ZjNOL-R    | CTCACCATACGCGTTACAGAATCTTCAACAACATACTTAT     |
| 3302YUBI-ZjNOL-F | GTGTTACTTCTGCAGAGGATGGCTGCCAGCGTCAGCAT       |
| 3302YUBI-ZjNOL-R | TAATCCAGATCTACCATAGGCTAATCTTCAACAACATACT     |
| YNE-ZjNYC-F      | TCGATAGTACTGTCGACCTCATGGCCGCCGCCGCCGTCGC     |
| YNE-ZjNYC-R      | ATCCCGGGAGCGGTACCCTCTGTGCCTGGAAGAGGACCAC     |
| YCE-ZjNOL-F      | CCTGGCGCGCCACTAGTGGAATGGCTGCCAGCGTCAGCAT     |
| YCE-ZjNOL-R      | TCGACAGTACTATCGATGGAATCTTCAACAACATACTTAT     |
| AsCLH1-RT-F      | AGGAGGAGGGCTCGTAGGT                          |
| AsCLH1-RT-R      | GGTCTTCCGTCTGTGCTT                           |
| AsNYC-RT-F       | GATGGGCTATGTTGACTCTT                         |
| AsNYC-RT-R       | CTCCACCTGATAACTGAAAT                         |
| AsNCED-RT-F      | CGGAGACAGACGAGGTTGTAG                        |
| AsNCED-RT-R      | TGAGACTTTAGGCCACGGTTC                        |
| AsZDS-RT-F       | ATGGTCCAGCGTGGTAAAGA                         |
| AsZDS-RT-R       | GGATGGCTAACAGCTCCTCT                         |
| ZjACT-F          | GGTCCTCTTCCAGCCATCCTTC                       |
| ZjACT-R          | GTGCAAGGGCAGTGATCTCCTTG                      |
| AsACT-F          | GAGGTCCTTCCTGATATCCA                         |
| AsACT-R          | CCTTTTCCAGCCATCTTTCA                         |
| AsFEH-F          | AGGGAAGGATAGTCCAAGAG                         |
| AsFEH-R          | TTATAGGCAAGGAATGAGGG                         |
| AsTPS-F          | CCCTTGTTTACACCCTGTGG                         |
| AsTPS-R          | GGAGCCTGTGATGAAGACCTA                        |
| AsCK1-F          | CTGACGACCTTGGGAATAGA                         |
| AsCK1-R          | TGAACTGTACCACGGAAACG                         |
| AsYLS3-F         | CACCAACATCTCCGACTGCC                         |
| AsYLS3-R         | CCCACTCCCAACCACCTCAT                         |
| AsJRL9-F         | GAGTCCCTCCTTTATCTGCG                         |
| AsJRL9-R         | ACGGTGGCTGGAAACTACAA                         |
| AsWRKY23-F       | ACGACCCATTCTCTCCATAGCTCCT                    |
| AsWRKY23-R       | AGGAGCTATGGAGAGAATGGGTCGT                    |
| AsLOX-F          | GCGTCTGCCTTGCGAACTCC                         |
| AsLOX-R          | CGCCGCTCCTAAACCACTCA                         |
| AsERF9-F         | GGCTGGAGGCTTGGAGGAGA                         |
| AsERF9-R         | CACCGCCCACCAGAAGAACC                         |
| AsFAR1-F         | TCGTCATTATTCGTCCCACC                         |
| AsFAR1-R         | CTTGCCCTTTCTCATTCCAG                         |
| AsERF4-F         | TCCTCGGGTCCAGGAACAGG                         |
| AsERF4-R         | CCAACTTCCCTCCACCTCC                          |

Supplementary Table S3. Protein sequence of 15 NOL proteins

|           | Protein sequence                                                                                                                                                                                                                                                                                                                                                                                              |
|-----------|---------------------------------------------------------------------------------------------------------------------------------------------------------------------------------------------------------------------------------------------------------------------------------------------------------------------------------------------------------------------------------------------------------------|
| ZjNOL     | MAASVSIIVRLPPRSPACVGAPPLSSLAAAAAGGARFPGRRRERRRLAARG<br>GRALAGIRAEAVAAGGRREPMVPPYNVLITGSTKGIGYAFKKFLEAGD<br>NVIICSRSAQKVESVVGDLKKEYGEQHVWGTVCVDRDGKDVKALVEFA<br>RDCLKHIDIWINNAGSNAYTYKPLVETSDEALMEVITTNTLGLMICCREAI<br>NMMRNQPRGFAAYGATKRSVVHLTKSLQAE LQMNEVNNVMVHNLS<br>GMVTTDLLMSGATTQAKFFINILAEPPDVVADYLVPNIRTIPTNQSMKP<br>TYFRYLTGLKAYSRIFSRLAFGARRNKYVVED                                                 |
| OsNOL     | MAATAAYLPLRAQAQVGLAPLRPSGSAAAGARLPGRRTARRRLAARGGP<br>EAAGIRAEAVPGGGGVARRAAMVPPYNVLITGSTKGIGYALAKEFLKAG<br>DNVVICSRSAERVESAVTDLKKEFGGEQHVWGIVCDVREGKDVKALVDFA<br>RDKMKYIDIWINNAGSNAYSYPKPLVETSDEALMEVITTNTLGLMICCREA<br>INMMRNQPRGGHIFNIDGAGSDGRPTPRFAAYGATKRSVVHLTKSLQAE<br>LQMNEVNNVMVHNLSPGMVTTDLLMSGATTQAKFFINILAE PANVV<br>HVTRDISMSDPIYLPYMLLMVADYLVPNIRAIP TNQSMKPTYIRFLTGLKA<br>YSRIFSRIA FGARRNKYVAED |
| DoNOL     | MAASVAAHLPLRAPAPVGAAPSRPSLA AAVARFRGRAERRELLAARGGRG<br>LAGARAEAVTGGGGGGGLREPMVPPYNVLITGSTKGIGYALARKFLEAG<br>DNVVICSRSAEKVESVVGDLKREYGEQHVWGTACDVDRDGKDVKALVEF<br>ARDCLKHIDIWINNAGSNAYTYKPLVETSDEALMEIITNTLGLMICCRE<br>AINMMRNQPRGGHIFNLDGAGSDGRPTPRFAAYGATKRSVVHLTKSLQ<br>AELQMNEVNNVMVHNLSPGMVTTDLLMSGATTQAKFFINILAEPPDV<br>VADYLVPNIREIPSNQSMKPTYIRFLTGLKAYSRIFSRLAFGARRNKYVTE<br>D                         |
| SbNOL     | MAATATVAVHLPLRGPAPSGPSVAAATRFRGRQERRGLAATGGRGLA<br>RFRAEAFSGGGGGGRRDPMVPPYNVLITGSTKGIGYALARKFLEAGDNVI<br>ICSRSAQKVESVVGDLKKEYGVQHVWGTVCVDRDGKDVKALVEFARDK<br>LKHIDLWINNAGSNAYTYKPLVETSDEALMEIITNTLGLMICCREAINM<br>MRNQPRGGHIFNLDGAGSDGRPTPRFAAYGATKRSVVHLTKSLQAE LQ<br>MNEVNNVMVHNLSPGMVTTDLLMSGATTQAKFFINILAEPPDVVADY<br>LVPNVRAIPTNQSMKPTYIRFLTGLKAYSRIFSRLAFGARRNKYVTE<br>D                                |
| PmNO<br>L | MAASAAHLPLRAPARVGTAPSLPSAAAVARLRGRPERRGLAAAPRGA<br>RGLGGVRAEAVSGGGGGGGGGPREPMVPPYNVLITGSTKGIGYALARKF<br>LEAGDNVVICSRSAEKVESVVGDLKREYGEQHVWGTVCVDRDGKDVKA<br>LVEFARDCLKHIDIWINNAGSNAYTYKPLVETSDEALMEIITNTLGLLIC<br>CREAINMMRNQPRGGHIFNLDGAGSDGRPTPRFAAYGATKRSVVHLTKSL<br>QAE LQMNEVNNVMVHNLSPGMVTTDLLMSGATTQAKFFINILAEPPD<br>VVADYLVPNIREIPSNQSMKPTYIRFLTGLKAYSRIFSRLAFGARRNKYVTE<br>D                         |
| SiNOL     | MAASVAAHLPLRAPGRVGAAPSRSSVA AVDRFRGRPERRGLAAAPRGG<br>RGLAWLRAEAVSGGGGGGGRRREPMVPPYNVLITGSTKGIGYALARKFLE<br>AGDNVIICSRSAEKVESVVGELKRGYGEQHVWGTACDVDRDGKDVKALV<br>EFARDCLKHIDIWINNAGSNAYTYKPLVETSDEALMEIITNTLGLMICCR<br>EAINMMRNQPRGGHIFNLDGAGSDGRPTPRFAAYGATKRSVVHLTKSLQ                                                                                                                                       |



|           |                                                                                                                                                                                                                                                                                                                                                                                                    |
|-----------|----------------------------------------------------------------------------------------------------------------------------------------------------------------------------------------------------------------------------------------------------------------------------------------------------------------------------------------------------------------------------------------------------|
|           | AELQMNEVNNVMVHNLSPGMVTTDLLMSGATTQAKFFINILAEPPDV<br>VADYLVNIREIPSNQSMKPTYIRFLTGLKAYSRIFSRLAFGARRNKYVTE                                                                                                                                                                                                                                                                                              |
| PhNOL     | MAASATAHLPLRAPARVGAAPSRPSATAVAGLRGRPERRGLAAAPRGR<br>GLGGVRAEAASGGGGGGGGPREPMVPPYNVLITGSTKGIGYALARKFLE<br>AGDNVVICSRSAEKVESVVGDLKREYGEQHVWGTVCVDRDGKDVKALV<br>EFARDKLKHIDIWINNAGSNAYTYKPLVETSDEALMEIITNTLGLMICCR<br>EAINMMRNQPRGGHIFNLDGAGSDGRPTPRFAAYGATKRSVVHLTKSLQ<br>AELQMNEVNNVMVHNLSPGMVTTDLLMSGATTQAKFFINILAEPPNV<br>VADYLVNIREIPSNQSMKPTYIRFLTGLKAYSRIFSRLAFGARRNKYVTE                      |
| ZmNO<br>L | MAATFTVAARLPLRGPAPSRPAVAAVTRLRSRQERRGLAATGGRGPA<br>RVRAETFSGGGGVGRDDPMAPPYNVLITGSTKGIGYALARKFLEAGDNV<br>ICSRSAQKVESVVGDLKEEYGEQHVWGTVCVDRNGKDVKALVEFARDK<br>LKHIDIWINNAGSNAYTYKPLVETSDEALMEIITNTLGLMICCREAINM<br>MRNQPRGGHIFNLDGAGSDGRPTPRFAAYGATKRSVVHLTKSLQAEQ<br>MNEVNNVMVHNLSPGMVTTDLLMSGATTQAKFFINILAEPPDVENG<br>VSGVNQTLGTNYANQHVVGGGRVADYLVNIREIPTKQSMKPTYIRFLT<br>GLKAYSRIFSRLAFGARRNKYVTE |
| BdNOL     | MATVAATLPFRAPTYLGPATFLTPSAAGARFPDRPQQRRLVAGGRHRELA<br>RIQAEAISGGGVARRDPMVPPYNVLITGSTKGIGYALAKKFLMAGDNV<br>ICSRSAERVESATNDLKKEFGEQHVWGTVCVDRREGKDVKALVDYARGKL<br>QYIDIWINNAGSNAYSYPKPLVETSDEALMEVITNTLGLMICCREAINMM<br>WNQPRGGHIFNLDGAGSDGRPTPRFAAYGATKRSVVHLTKSLQAEQ<br>NEVNNVVHNLSPGMVTTDLLMSGATTQAKFFINILAEPPDVADYLV<br>PNVRAIPTNQSMKPTYIRFLTGLKAYSRIFSRLAFGARRNKYVTE                            |
| JcNOL     | MSLSSTCLRFPSTLSSPLAHPRLPPQFHGYAFFTVTSRQKSINQKQTSNSA<br>AIANLNSPMAGNRPLINREPMVPPYNVLITGSTKGIGYALAKEFLKAGD<br>NIVICSRSAERVESAVQNLREEFGEEHVWGTTCVDRREGQDVKDVLVAFK<br>KHLNYIDLWINNAGSNAYSYPKPLAEASDEDLIEVTTNTLGLMICCREAI<br>KMMLNQPRGGHIFNLDGAGSDGRPTPRFAAYGATKRSVVHLTKSLQAEQ<br>QMQDVQNVVVHNLSPGMVTTDLLMSGATTQAKFFINILAEPAEVVAE<br>YLVNIRSIPIANGSRKPTYIRFLTGLKAYSQIFSRLAFGARRNRYVLE                   |
| MnNO<br>L | MWTVSTSLHSPSPFLSPLLSSKTKTHQSFDLTFQKNPFLPNFRRCRFLSISS<br>RQNPTGLSTVVRLRASASMAERQPMPEPPFNVLITGSSKGIGYALAKEFLK<br>AGDNVVICSRSERVESAVQSVKEEFGEQHVWGTTCVDRREGQDVKDVLVAF<br>AQRNLGHIDIWINNAGSNAYSYPKPLAEASDEDLIEVTTNTLGLMICCRE<br>AIKMMLNQPRGGHIFNLDGAGSDGRPTPRFAAYGATKRSVVHLTKSLQA<br>ELQMQDVNRNVVVHNLSPGMVTTDLLMSGATTQAKFFINILAEPAEVV<br>AEYLVNIRSIPIANGSRKPTYIRFLTGLKAYSQIFSRLAFGARRNRYLLE            |
| PyNOL     | MAITTSISSPSLSPLLFSKTHHTYFPRLDSPNFCKFDRCCCLPTVSSRQNPL<br>CLSSSGTWVLNASLVRAEASGNREPMVPPYNVLITGSTKGIGYALAKEFL<br>LKAGDNVVICSRSAERVKSQSLREDFGEQHVWGTTCVDRREGQDVKD<br>VSFAQKELKYIDIWINNAGSNAYSYPKPLSEASDEDLIEVTTNALGLMLC<br>CREAIKMMLNQPRGGHIFNLDGAGSDGRPTPRFAAYGATKRSVVHLTKS<br>LQAEQMQDVKNVAMHNLSPGMVTTDLLMSGATTQAKFFINALAE                                                                           |

PEVVAEYLIPNIRSIPANGSMKPTYIRFLTGIKAYSQIFSRFAFGARRNRYVLE  
ED

PaNOL MAITTSISSPSLSPLLFSKTHHTYFPRLDSHPNFCKFDRCCLPTVSSRQNPL  
CLSSSGTWVLNASLVRAEASNGREPMIPPYNVLITGSTKGIGYALAKEFL  
KAGDNVIICSRSAERVKS AVQSLREDFGEQHVWGTTCDVREGQDVKDLV  
SFAQKELKYIDIWINNAGSNAYSYPKPLSEASDEDLIEVVTTNALGLMLCC  
REAIKMMLNQPRGGHIFNIDGAGSDGRPTPRFAAYGATKRSVVHLTKSL  
QAE LQM QDVKNVAMHNLSPGMVTTDLLMSGATTQAKFFINVLAEPPE  
VVAEYLVPNIRSIPANGSMKPTYIRFLTGIKAYSQIFSRFAFGARRNRYVLE  
D

LpNOL MATVAAPLPLRAAACAGPAPFRLSSDDGARFPGR LGQRSLVAGVCRPRE  
SAGFRVEALFGGGGGGGPKPEMVPPYNVLITGSTKGIGYALAKKFLKAG  
DNVVICSRSAERVESATSDLKKEFGEQHVWGTVCDVREGKDV KALVDFA  
RDKLGYIDIWINNAGSNAYSFKPLVETSDEALIEVITNTNLGLMLCCREAI  
NMMWSQPRGGHIFNIDGAGSDGRPTPRFAAYGATKRSVVHLTKSLQAE L  
QMNEVNNVVVHNLSPGMVTTLLMSGATTQAKFFINILAEPPEVVAD  
YLVPNIRAIP TNQSMKPTYIRFLTGLRAYSRIFSRIA FGAARRNKYVTE D

AtNOL MATWSGFNVSSPLLRLRSSSVSNVTKLPFLSPICRRRLAERFGLATVVVT  
RQNLT VTPSSAAVEARISGKREPMTPPYN ILITGSTKGIGYALAREFLKAG  
DNVVICSRSAERVETAVQSLKEEFGEHVWG TKCDVTEGKDVRELVAYSQK  
NLKYIDIWINNAGSNAYSFKPLAEASDEDLIEVVKTNTNLGLMLCCREAM  
NMMLTQSRGGHIFNIDGAGSDGRPTPRFAAYGATKRSVVHLTKSLQAE L  
QM QDVKNVVVHNLSPGMVTTDLLMSGATTQAKFFINVLAEPAEVVAE  
YLVPNIRAIPASGSMKPTYIRFLTGIKAYTKIFSRVALGARKNRYVTEE

---
